# Supplementary material for: Integration of lipidomics and transcriptomics unravels aberrant lipid metabolism and defines cholesteryl oleate as potential biomarker of prostate cancer
Source: PubMed Central journal article supplement (PMC4750101; doi:10.1038/srep20984), 2016-02-11
Supplement: srep20984-s1.pdf [file srep20984-s1.pdf]

## SUPPLEMENTARY INFORMATION

### **Integration of lipidomics and transcriptomics unravels aberrant lipid metabolism and defines cholesteryl oleate as potential biomarker of prostate cancer**

Jia Li<sup>a,1</sup>, Shancheng Ren<sup>b,1</sup>, Hai-long Piao<sup>a</sup>, Fubo Wang<sup>b</sup>, Peiyuan Yin<sup>a</sup>, Chuanliang Xu<sup>b</sup>, Xin Lu<sup>a</sup>, Guozhu Ye<sup>a</sup>, Yaping Shao<sup>a</sup>, Min Yan<sup>a</sup>, Xinjie Zhao<sup>a</sup>, Yinghao Sun<sup>b,2</sup>, Guowang Xu<sup>a,2</sup>

<sup>a</sup> Key Laboratory of Separation Science for Analytical Chemistry, Dalian Institute of Chemical Physics, Chinese Academy of Sciences, 116023 Dalian, China.

<sup>b</sup> Department of Urology, Shanghai Changhai Hospital, Second Military Medical University, Shanghai, China

<sup>1</sup> contributed equally to this paper.

<sup>2</sup> To whom correspondence should be addressed.

Guowang Xu: Tel/Fax: +86-411-84379559. xugw@dicp.ac.cn.

Yinghao Sun: [sunyh@medmail.com.cn](mailto:sunyh@medmail.com.cn)

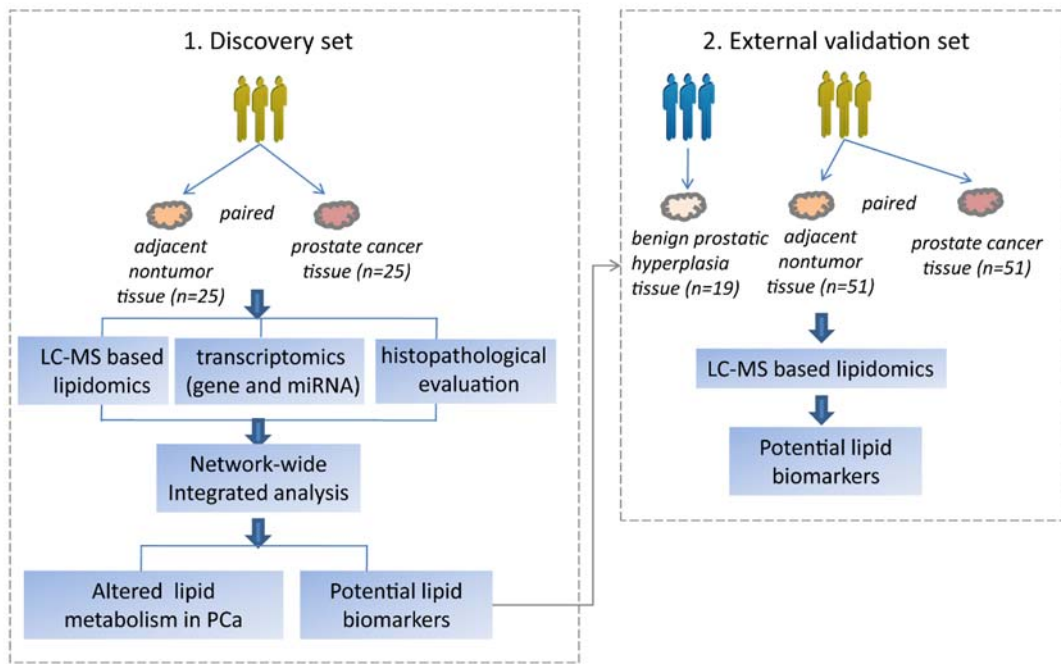

**Fig. S1.** Workflow diagram of study design.

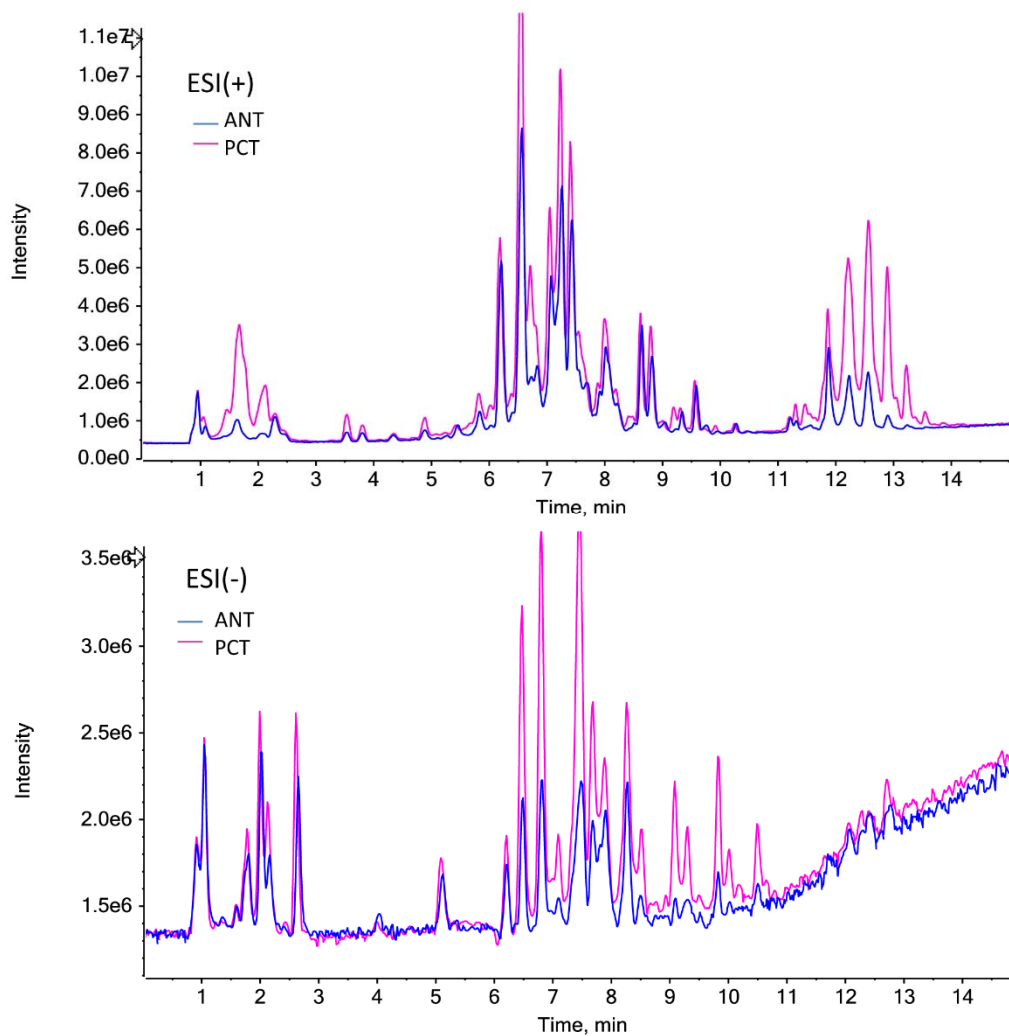

**Fig. S2** Typical TICs of paired ANT and PCT samples by global lipidomics analysis in ESI positive and negative modes. upper panel: ESI positive; lower panel: ESI negative.

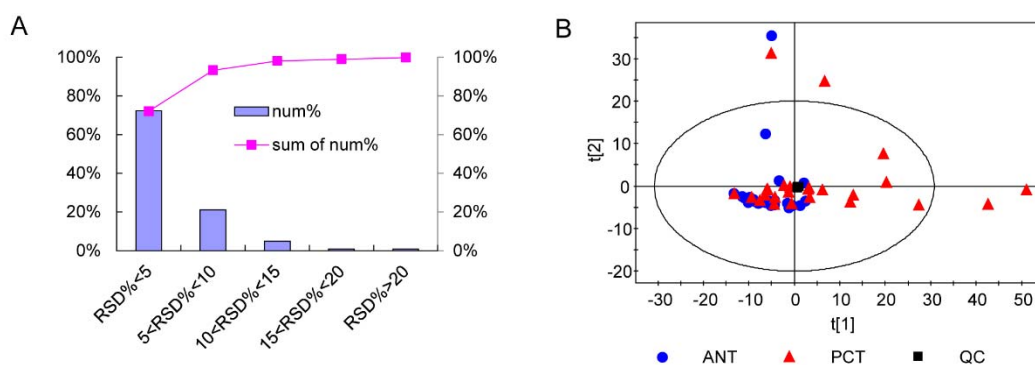

**Fig. S3.** Analytical precision and robustness evaluation of lipidomics analysis of discovery set. A, Coefficient of variation (CV) distribution of detected 350 lipid species in 7 QC samples. num%, percentage of lipid species within a defined CV range. sum of num%, accumulated percentage of lipid species below a defined CV criterion. CV is presented as relative standard deviation (RSD). B, Principal component analysis (PCA) score plot of lipidomic profile of 25 paired PCT-ANT tissue consisting of 347 lipid variables (RSD%<20) after unit variance (uv) scaling ( $R^2X=0.887$ ,  $Q^2=0.576$ ). Blue dot, red triangle and black box denote ANT, PCT and QC sample, respectively.

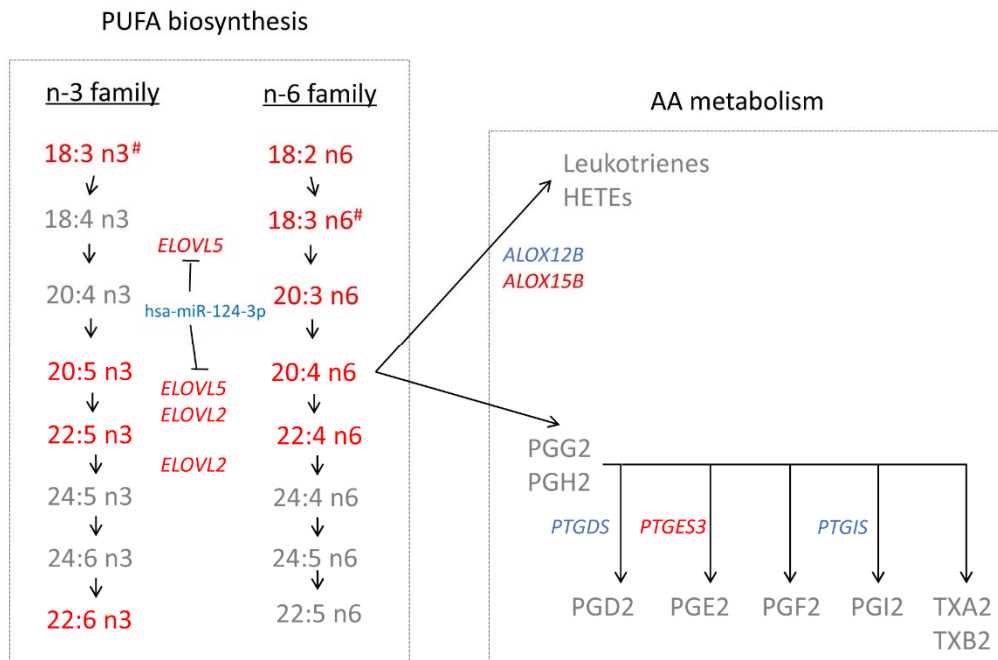

**Fig. S4.** Integrated pathway depicting PUFA biogenesis and metabolism. Red, blue, black and grey colored denote significantly increased, significantly decreased, unchanged, and undetected metabolite, or gene, or miRNA, respectively. In italics are gene names. #, isomers FFA 18:3 n3 and FFA 18:3 n6 are not distinguishable in applied lipidomics analysis, therefore increased level shown is their total amount. In PUFA biosynthesis, The rate-limiting gene *FADS2* (fatty acid desaturase, or  $\Delta$ -6 desaturase) was not significantly changed. Hence we speculated that the biosynthesis of PUFA was unaffected. In arachidonic acid (AA) metabolism, genes *ALOX15B* (arachidonate 15-lipoxygenase, type B) and *PTGES3* (prostaglandin E synthase 3), involved in COX (cyclooxygenase) and LOX (lipoxygenase) pathways showed increased expression in PCa. HETE, hydroxyeicosatetraenoic acid; PGG2/H2/D2/E2/F2/I2, prostaglandin G2/H2/D2/E2/F2/I2; TXA2/B2, thromboxane A2/B2. Statistical significance was evaluated by Wilcoxon Signed-Rank test.

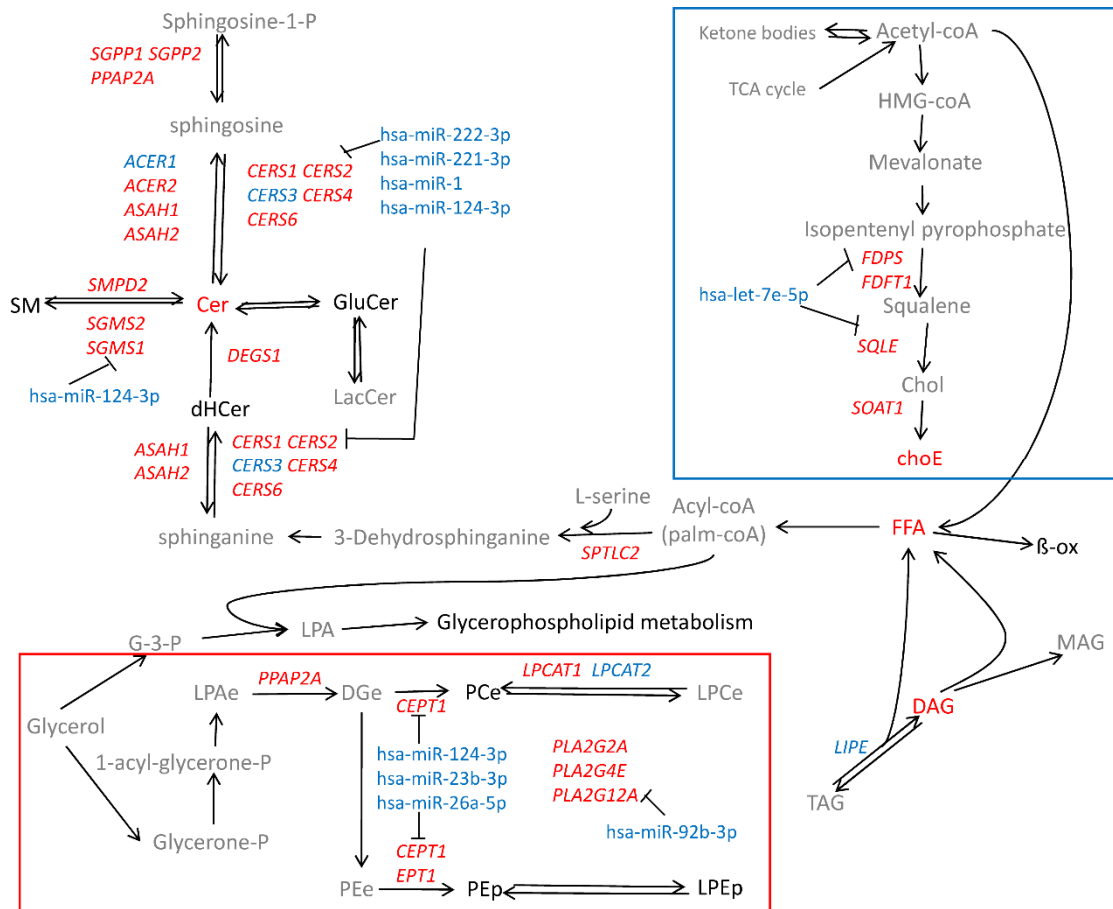

**Fig. S5.** Integrated pathway depicting lipid metabolism covering ether lipids, sphingolipids, glycerolipids and cholesterol. Red, blue, black and grey colored are significantly increased, significantly decreased, unchanged, and undetected metabolite, or gene, or miRNA, respectively. In italics are gene names. Red box and blue box indicate ether lipid and cholesterol metabolism, respectively. The characteristic remodeling pattern described in PL metabolism (Fig. 2B) was also observed in ether lipid pathway (red box) as revealed by expression alterations of a same set of genes in relation to PLA2 and LPLAT. It was consistent with the reduction of PUFA% and ether-linked chain% in PLs (Fig. 1E, 1F and supplementary Table S4) and reduction of a set of ether lipid-to-downstream metabolite-ratios, i.e., PE(18:0p/20:4)/LPE18:0p (PCT/ANT=0.62,  $p=0.005$ ), PE(18:1p/20:4)/LPE18:1p (PCT/ANT =0.59,  $p=0.006$ ), PE(18:0p/22:4)/LPE18:0p (PCT/ANT =0.65,  $p=0.019$ ), PE(18:0p/22:6)/LPE18:0p (PCT/ANT =0.67,  $p=0.026$ ). Depletion of ether-linked chain% may be due to the anti-oxidative nature of plasmalogens<sup>1</sup>, in response to oxidative stress in PCa<sup>2</sup>. In Cholesterol biosynthesis (blue box), gene expression of *HMGCR* (HMG-CoA reductase), the major committed gene in cholesterol synthesis, was not changed. Therefore we speculated that cholesterol biosynthesis was unchanged. Statistical significance was evaluated by Wilcoxon Signed-Rank test.

**Table S1** Detailed information of clinical characteristics of all participants enrolled in discovery and validation set.

| No.                   | Preoperative PSA | Stage   | Gleason Score | Metastasis* | sample tissue |
|-----------------------|------------------|---------|---------------|-------------|---------------|
| <b>discovery set</b>  |                  |         |               |             |               |
| 1                     | unknown          | unknown | 5+5           | unknown     | ANT, PCT      |
| 2                     | 12.10            | T2cN0M0 | 3+4           | 1           | ANT, PCT      |
| 3                     | 9.03             | T3aN0M0 | 3+4           | 2           | ANT, PCT      |
| 4                     | 7.95             | T2cN0M0 | 4+5           | 1           | ANT, PCT      |
| 5                     | 13.41            | T2cN0M0 | 4+4           | 1           | ANT, PCT      |
| 6                     | 30.60            | unknown | 4+4           | 3           | ANT, PCT      |
| 7                     | unknown          | unknown | 4+3           | unknown     | ANT, PCT      |
| 8                     | 35.43            | T2cN0M0 | 4+4           | 1           | ANT, PCT      |
| 9                     | 7.43             | T2cN0M0 | 3+3           | 1           | ANT, PCT      |
| 10                    | 20.00            | T2cN0M0 | 3+4           | 1           | ANT, PCT      |
| 11                    | 11.10            | T2cN1M0 | 3+4           | 3           | ANT, PCT      |
| 12                    | 45.29            | T3bN1M0 | 4+5           | 3           | ANT, PCT      |
| 13                    | 10.71            | T3aN0M0 | 4+3           | 2           | ANT, PCT      |
| 14                    | 5.38             | T2cN0M0 | 4+3           | 1           | ANT, PCT      |
| 15                    | 10.74            | T2cN0M0 | 3+5           | 1           | ANT, PCT      |
| 16                    | 63.83            | T3bN0M0 | 4+5           | 2           | ANT, PCT      |
| 17                    | 7.96             | T2cN0M0 | 3+4           | 1           | ANT, PCT      |
| 18                    | 14.41            | T2cN0M0 | 3+4           | 1           | ANT, PCT      |
| 19                    | 5.28             | T2cN0M0 | 4+3           | 1           | ANT, PCT      |
| 20                    | 22.07            | T2cN0M0 | 3+4           | 1           | ANT, PCT      |
| 21                    | 21.63            | T2cN0M0 | 4+4           | 1           | ANT, PCT      |
| 22                    | 9.85             | T3bN0M0 | 5+5           | 2           | ANT, PCT      |
| 23                    | 93.45            | T2cN0M0 | 5+4           | 1           | ANT, PCT      |
| 24                    | 9.52             | T2cN0M0 | 3+4           | 1           | ANT, PCT      |
| 25                    | 31.19            | T2cN0M0 | 3+3           | 1           | ANT, PCT      |
| <b>validation set</b> |                  |         |               |             |               |
| 1                     | 49.80            | T2cN0M0 | 4+3           | 1           | ANT, PCT      |
| 2                     | 21.49            | T3aN0M0 | 4+5           | 2           | ANT, PCT      |
| 3                     | 44.10            | T2aN0M0 | 4+3           | 1           | ANT, PCT      |
| 4                     | 65.40            | T2cN0M0 | 3+4           | 1           | ANT, PCT      |
| 5                     | 8.80             | T2cN0M0 | 5+5           | 1           | ANT, PCT      |
| 6                     | 17.38            | T2cN0M0 | 3+4           | 1           | ANT, PCT      |
| 7                     | 39.60            | T3aN0M0 | 3+4           | 2           | ANT, PCT      |
| 8                     | 14.90            | T2cN0M0 | 3+3           | 1           | ANT, PCT      |
| 9                     | 4.04             | T2cN0M0 | 3+4           | 1           | ANT, PCT      |
| 10                    | 8.75             | T2cN0M0 | 3+3           | 1           | ANT, PCT      |
| 11                    | 13.00            | T2cN0M0 | 5+4           | 1           | ANT, PCT      |
| 12                    | 17.53            | T4N0M0  | 3+4           | 2           | ANT, PCT      |
| 13                    | 13.91            | T3bN1M0 | 5+4           | 3           | ANT, PCT      |
| 14                    | 14.91            | T3bN0M0 | 5+4           | 2           | ANT, PCT      |
| 15                    | 22.75            | T3bN0M0 | 4+3           | 2           | ANT, PCT      |

|     |        |         |     |   |          |
|-----|--------|---------|-----|---|----------|
| 16  | 22.00  | T3bN0M0 | 5+4 | 2 | ANT, PCT |
| 17  | 44.38  | T4N0M0  | 4+3 | 2 | ANT, PCT |
| 18  | 6.37   | T4N0M0  | 3+4 | 2 | ANT, PCT |
| 19  | 100.00 | T3bN0M0 | 4+3 | 2 | ANT, PCT |
| 20  | 12.14  | T2cN0M0 | 3+4 | 1 | ANT, PCT |
| 21  | 12.80  | T2cN0M0 | 3+4 | 1 | ANT, PCT |
| 22  | 52.58  | T4N0M0  | 4+3 | 2 | ANT, PCT |
| 23  | 7.34   | T2cN0M0 | 4+3 | 1 | ANT, PCT |
| 24  | 14.30  | T3bN0M0 | 3+4 | 2 | ANT, PCT |
| 25  | 14.45  | T2cN0M0 | 4+5 | 1 | ANT, PCT |
| 26  | 8.16   | T2cN0M0 | 4+3 | 1 | ANT, PCT |
| 27  | 10.20  | T3N1M0  | 5+5 | 1 | ANT, PCT |
| 28  | 11.47  | T2bN0M0 | 3+4 | 1 | ANT, PCT |
| 29  | 25.09  | T3aN0M0 | 4+5 | 2 | ANT, PCT |
| 30  | 25.68  | T3aN0M0 | 3+4 | 2 | ANT, PCT |
| 31  | 8.68   | T2bN0M0 | 3+3 | 1 | ANT, PCT |
| 32  | 28.00  | T3bN0M0 | 4+5 | 2 | ANT, PCT |
| 33  | 25.00  | T2cN0M0 | 4+5 | 1 | ANT, PCT |
| 34  | 16.00  | T2bN0M0 | 3+4 | 1 | ANT, PCT |
| 35  | 12.30  | T2bN0M0 | 3+4 | 1 | ANT, PCT |
| 36  | 11.22  | T2cN0M0 | 3+4 | 1 | ANT, PCT |
| 37  | 4.48   | T2bN0M0 | 3+3 | 1 | ANT, PCT |
| 38  | 62.00  | T2cN0M0 | 4+3 | 1 | ANT, PCT |
| 39  | 43.50  | T2cN0M0 | 4+3 | 1 | ANT, PCT |
| 40  | 18.26  | T2bN0M0 | 3+4 | 1 | ANT, PCT |
| 41  | 9.08   | T2bN0M0 | 3+4 | 1 | ANT, PCT |
| 42  | 17.30  | T2cN0M0 | 4+4 | 1 | ANT, PCT |
| 43  | 17.87  | T2bN0M0 | 3+4 | 1 | ANT, PCT |
| 44  | 41.39  | T3aN1M0 | 5+4 | 3 | ANT, PCT |
| 45  | 30.31  | T3bN0M0 | 3+4 | 2 | ANT, PCT |
| 46  | 15.50  | T2bN0M0 | 3+4 | 1 | ANT, PCT |
| 47  | 26.44  | T2bN0M0 | 3+3 | 1 | ANT, PCT |
| 48  | 0.63   | T2cN0M0 | 4+3 | 1 | ANT, PCT |
| 49  | 40.38  | T3aN0M0 | 4+3 | 2 | ANT, PCT |
| 50  | 13.10  | T2cN0M0 | 5+3 | 1 | ANT, PCT |
| 51  | 16.66  | T2bN0M0 | 3+3 | 1 | ANT, PCT |
| B1  | 23.68  |         |     |   | BPH      |
| B2  | 16.76  |         |     |   | BPH      |
| B3  | 1.46   |         |     |   | BPH      |
| B4  | 11.04  |         |     |   | BPH      |
| B5  | 42.73  |         |     |   | BPH      |
| B6  | 5.66   |         |     |   | BPH      |
| B7  | 1.79   |         |     |   | BPH      |
| B8  | 3.09   |         |     |   | BPH      |
| B9  | 0.53   |         |     |   | BPH      |
| B10 | 10.60  |         |     |   | BPH      |



|     |         |     |
|-----|---------|-----|
| B11 | unknown | BPH |
| B12 | unknown | BPH |
| B13 | unknown | BPH |
| B14 | 0.53    | BPH |
| B15 | 0.99    | BPH |
| B16 | 1.09    | BPH |
| B17 | 1.17    | BPH |
| B18 | 1.62    | BPH |
| B19 | 0.96    | BPH |

---

\*, 1=localized, 2=locally advanced, 3=metastatic

**Table S2** Comprehensive list of identified 350 lipids in prostate tissue. Unique chain compositions were assigned for approximately 99% of sphingolipids and 97% of phospholipids (calculated as abundance %) based on high resolution MS/MS. PCT/ANT, folds change of PCT vs. ANT, calculated as ratio of mean value of PCT vs. ANT. Statistical significance was determined by Wilcoxon Signed-Rank test.

| lipid      | composition*    | adduct in ESI(+)  | adduct in ESI(-) | polarity for quantitation | PCT vs ANT (discovery set) |         |
|------------|-----------------|-------------------|------------------|---------------------------|----------------------------|---------|
|            |                 |                   |                  |                           | PCT/ANT                    | p value |
| CE 18:1    |                 | M+NH <sub>4</sub> |                  | positive                  | 11.78                      | 0.000   |
| CE 20:1    |                 | M+NH <sub>4</sub> |                  | positive                  | 45.48                      | 0.000   |
| CE 22:6    |                 | M+NH <sub>4</sub> |                  | positive                  | 10.48                      | 0.000   |
| CE 24:4    |                 | M+NH <sub>4</sub> |                  | positive                  | 24.86                      | 0.000   |
| CE 24:5    |                 | M+NH <sub>4</sub> |                  | positive                  | 35.46                      | 0.000   |
| CE 28:5    |                 | M+NH <sub>4</sub> |                  | positive                  | 27.96                      | 0.000   |
| Cer 34:1;2 | Cer(d18:1/16:0) | M+H               |                  | positive                  | 1.46                       | 0.122   |
| Cer 34:2;2 | unknown         | M+H               |                  | positive                  | 4.44                       | 0.000   |
| Cer 36:1;2 | Cer(d18:1/18:0) | M+H               |                  | positive                  | 2.24                       | 0.007   |
| Cer 38:1;2 | Cer(d18:1/20:0) | M+H               |                  | positive                  | 2.41                       | 0.001   |
| Cer 38:2;2 | Cer(d18:2/20:0) | M+H               |                  | positive                  | 11.38                      | 0.000   |
| Cer 40:1;2 | Cer(d18:1/22:0) | M+H               |                  | positive                  | 2.52                       | 0.002   |
| Cer 40:2;2 | Cer(d18:1/22:1) | M+H               |                  | positive                  | 5.99                       | 0.000   |
| Cer 41:1;2 | Cer(d18:1/23:0) | M+H               |                  | positive                  | 3.32                       | 0.001   |
| Cer 42:1;2 | Cer(d18:1/24:0) | M+H               |                  | positive                  | 1.50                       | 0.221   |
| Cer 42:2;2 | Cer(d18:1/24:1) | M+H               |                  | positive                  | 1.47                       | 0.158   |
| DAG 34:2   |                 | M+NH <sub>4</sub> |                  | positive                  | 1.83                       | 0.011   |
| DAG 36:1   |                 | M+NH <sub>4</sub> |                  | positive                  | 2.97                       | 0.000   |
| DAG 36:2   |                 | M+NH <sub>4</sub> |                  | positive                  | 2.27                       | 0.001   |
| DAG 36:3   |                 | M+NH <sub>4</sub> |                  | positive                  | 2.04                       | 0.002   |
| DAG 36:4   |                 | M+NH <sub>4</sub> |                  | positive                  | 1.39                       | 0.143   |
| DAG 38:2   |                 | M+NH <sub>4</sub> |                  | positive                  | 6.54                       | 0.000   |
| DAG 38:4   |                 | M+NH <sub>4</sub> |                  | positive                  | 0.79                       | 0.032   |
| FFA14:0    |                 |                   | M-H              | negative                  | 1.33                       | 0.017   |
| FFA15:0    |                 |                   | M-H              | negative                  | 1.06                       | 0.326   |
| FFA16:0    |                 |                   | M-H              | negative                  | 1.20                       | 0.109   |
| FFA16:1    |                 |                   | M-H              | negative                  | 1.70                       | 0.004   |
| FFA17:0    |                 |                   | M-H              | negative                  | 1.26                       | 0.023   |
| FFA18:0    |                 |                   | M-H              | negative                  | 1.14                       | 0.264   |
| FFA18:1    |                 |                   | M-H              | negative                  | 2.51                       | 0.000   |
| FFA18:2    |                 |                   | M-H              | negative                  | 1.83                       | 0.008   |
| FFA18:3    |                 |                   | M-H              | negative                  | 1.41                       | 0.035   |
| FFA19:0    |                 |                   | M-H              | negative                  | 1.73                       | 0.000   |
| FFA20:0    |                 |                   | M-H              | negative                  | 1.76                       | 0.001   |
| FFA20:1    |                 |                   | M-H              | negative                  | 5.46                       | 0.000   |
| FFA20:2    |                 |                   | M-H              | negative                  | 3.90                       | 0.000   |
| FFA20:3    |                 |                   | M-H              | negative                  | 4.00                       | 0.000   |
| FFA20:4    |                 |                   | M-H              | negative                  | 2.61                       | 0.000   |

|               |                       |                   |       |          |       |       |
|---------------|-----------------------|-------------------|-------|----------|-------|-------|
| FFA20:5       |                       |                   | M-H   | negative | 2.49  | 0.002 |
| FFA22:0       |                       |                   | M-H   | negative | 2.10  | 0.000 |
| FFA22:1       |                       |                   | M-H   | negative | 3.25  | 0.000 |
| FFA22:2       |                       |                   | M-H   | negative | 4.43  | 0.000 |
| FFA22:3       |                       |                   | M-H   | negative | 5.39  | 0.000 |
| FFA22:4       |                       |                   | M-H   | negative | 2.09  | 0.020 |
| FFA22:5       |                       |                   | M-H   | negative | 3.06  | 0.001 |
| FFA22:6       |                       |                   | M-H   | negative | 3.51  | 0.000 |
| HexCer 34:1;2 | HexCer(d18:1/16:0)    | M+H               |       | positive | 1.12  | 0.397 |
| HexCer 34:1;3 | HexCer(d18:1/16:0)-OH | M+H               |       | positive | 4.57  | 0.001 |
| HexCer 36:1;2 | HexCer(d18:1/18:0)    | M+H               |       | positive | 1.71  | 0.443 |
| HexCer 38:1;2 | HexCer(d18:1/20:0)    | M+H               |       | positive | 2.52  | 0.211 |
| HexCer 40:1;2 | HexCer(d18:1/22:0)    | M+H               |       | positive | 2.89  | 0.042 |
| HexCer 40:2;2 | HexCer(d18:1/22:1)    | M+H               |       | positive | 10.22 | 0.000 |
| HexCer 41:1;2 | HexCer(d18:1/23:0)    | M+H               |       | positive | 4.45  | 0.000 |
| HexCer 42:1;2 | HexCer(d18:1/24:0)    | M+H               |       | positive | 1.88  | 0.677 |
| LPC 14:0      |                       | M+H               | M+AcO | positive | 4.54  | 0.002 |
| LPC 16:0      |                       | M+H               | M+AcO | positive | 2.48  | 0.083 |
| LPC 17:0      |                       | M+H               | M+AcO | positive | 2.33  | 0.004 |
| LPC 18:0      |                       | M+H               | M+AcO | positive | 1.82  | 0.231 |
| LPC 18:1      |                       | M+H               | M+AcO | positive | 3.05  | 0.042 |
| LPC 18:2      |                       | M+H               | M+AcO | positive | 1.54  | 0.427 |
| LPC 20:0      |                       | M+H               | M+AcO | positive | 3.15  | 0.004 |
| LPC 20:1      |                       | M+H               | M+AcO | positive | 3.36  | 0.074 |
| LPC 20:2      |                       | M+H               | M+AcO | positive | 2.59  | 0.115 |
| LPC 20:4      |                       | M+H               | M+AcO | positive | 0.85  | 0.476 |
| LPE 16:0      |                       | M+H               | M-H   | positive | 2.04  | 0.696 |
| LPE 17:0      |                       | M+H               | M-H   | positive | 1.51  | 0.042 |
| LPE 18:0      |                       | M+H               | M-H   | positive | 2.40  | 0.115 |
| LPE 18:1      |                       | M+H               | M-H   | positive | 4.04  | 0.061 |
| LPE 18:2      |                       | M+H               | M-H   | positive | 3.59  | 0.032 |
| LPE 20:0      |                       | M+H               | M-H   | positive | 4.68  | 0.000 |
| LPE 20:1      |                       | M+H               | M-H   | positive | 3.95  | 0.065 |
| LPE 20:2      |                       | M+H               | M-H   | positive | 3.67  | 0.061 |
| LPE 20:4      |                       | M+H               | M-H   | positive | 1.12  | 0.696 |
| LPE 22:6      |                       | M+H               | M-H   | positive | 1.69  | 0.058 |
| LPE P-16:0    |                       | M+H               | M-H   | positive | 1.91  | 0.264 |
| LPE P-18:0    |                       | M+H               | M-H   | positive | 1.76  | 0.382 |
| LPE P-18:1    |                       | M+H               | M-H   | positive | 2.74  | 0.143 |
| LPI 18:0      |                       | M+NH <sub>4</sub> | M-H   | negative | 2.36  | 0.001 |
| LPS 18:0      |                       | M+H               | M-H   | positive | 3.52  | 0.001 |
| PA 36:1       | PA(18:0/18:1)         | M+NH <sub>4</sub> | M-H   | negative | 1.23  | 0.493 |
| PC 28:0       | unknown               | M+H               | M+AcO | positive | 5.39  | 0.000 |
| PC 30:1       | unknown               | M+H               | M+AcO | positive | 3.68  | 0.000 |
| PC 31:0       | PC(15:0/16:0)         | M+H               | M+AcO | positive | 1.25  | 0.242 |
| PC 32:0       | PC(16:0/16:0)         | M+H               | M+AcO | positive | 0.94  | 0.459 |

|           |                               |     |       |          |      |       |
|-----------|-------------------------------|-----|-------|----------|------|-------|
| PC 32:1   | PC(14:0/18:1)                 | M+H | M+AcO | positive | 2.34 | 0.001 |
| PC 32:2   | PC(16:1/16:1)                 | M+H | M+AcO | positive | 2.30 | 0.003 |
| PC 33:0   | PC(16:0/17:0)                 | M+H | M+AcO | positive | 2.54 | 0.000 |
| PC 33:1   | PC(16:0/17:1)                 | M+H | M+AcO | positive | 2.57 | 0.000 |
| PC 33:2   | unknown                       | M+H | M+AcO | positive | 3.14 | 0.000 |
| PC 34:0   | PC(16:0/18:0)                 | M+H | M+AcO | positive | 1.22 | 0.300 |
| PC 34:1   | PC(16:0/18:1)                 | M+H | M+AcO | positive | 3.19 | 0.000 |
| PC 34:2   | PC(16:0/18:2)                 | M+H | M+AcO | positive | 1.57 | 0.065 |
| PC 34:3   | PC(16:0/18:3)                 | M+H | M+AcO | positive | 1.69 | 0.019 |
| PC 34:4   | PC(20:4/14:0)                 | M+H | M+AcO | positive | 2.06 | 0.002 |
| PC 35:1   | PC(17:0/18:1)                 | M+H | M+AcO | positive | 3.72 | 0.000 |
| PC 35:2   | PC(18:2/17:0)                 | M+H | M+AcO | positive | 1.75 | 0.004 |
| PC 35:3   | unknown                       | M+H | M+AcO | positive | 1.73 | 0.007 |
| PC 35:4   | PC(20:4/15:0)                 | M+H | M+AcO | positive | 1.12 | 0.493 |
| PC 36:0   | PC(18:0/18:0)                 | M+H | M+AcO | positive | 1.75 | 0.007 |
| PC 36:1   | PC(18:0/18:1)                 | M+H | M+AcO | positive | 2.25 | 0.001 |
| PC 36:2   | PC(18:1/18:1)                 | M+H | M+AcO | positive | 1.68 | 0.058 |
| PC 36:3   | PC(18:1/18:2)                 | M+H | M+AcO | positive | 1.97 | 0.004 |
| PC 36:4   | PC(16:0/20:4)                 | M+H | M+AcO | positive | 1.16 | 0.861 |
| PC 36:5   | PC(16:0/20:5)                 | M+H | M+AcO | positive | 1.10 | 0.600 |
| PC 37:1   | unknown                       | M+H | M+AcO | positive | 4.12 | 0.000 |
| PC 37:2   | unknown                       | M+H | M+AcO | positive | 3.18 | 0.000 |
| PC 37:4   | PC(20:4/17:0)                 | M+H | M+AcO | positive | 1.23 | 0.326 |
| PC 38:1   | unknown                       | M+H | M+AcO | positive | 2.84 | 0.001 |
| PC 38:2   | PC(18:0/20:2)                 | M+H | M+AcO | positive | 3.06 | 0.001 |
| PC 38:3   | PC(18:0/20:3)                 | M+H | M+AcO | positive | 1.43 | 0.093 |
| PC 38:4   | PC(18:0/20:4)                 | M+H | M+AcO | positive | 0.97 | 0.476 |
| PC 38:5   | PC(16:0/22:5)                 | M+H | M+AcO | positive | 1.50 | 0.088 |
| PC 38:6   | PC(16:0/22:6)                 | M+H | M+AcO | positive | 1.40 | 0.166 |
| PC 40:3   | PC(20:2/20:1)                 | M+H | M+AcO | positive | 2.28 | 0.005 |
| PC 40:4   | PC(18:0/22:4)/PC(20:3/20:1)   | M+H | M+AcO | positive | 1.39 | 0.326 |
| PC 40:5   | PC(22:5/18:0)                 | M+H | M+AcO | positive | 1.46 | 0.054 |
| PC 40:6   | PC(18:0/22:6)                 | M+H | M+AcO | positive | 1.21 | 0.619 |
| PC O-30:0 | unknown                       | M+H | M+AcO | positive | 1.42 | 0.276 |
| PC O-30:1 | unknown                       | M+H | M+AcO | positive | 2.04 | 0.007 |
| PC O-32:0 | PC(16:0e/16:0)                | M+H | M+AcO | positive | 0.91 | 0.545 |
| PC O-32:1 | PC(16:1e/16:0)                | M+H | M+AcO | positive | 1.15 | 0.757 |
| PC O-34:0 | PC(18:0e/16:0)                | M+H | M+AcO | positive | 0.99 | 0.677 |
| PC O-34:1 | PC(18:1e/16:0)                | M+H | M+AcO | positive | 1.06 | 0.925 |
| PC O-34:2 | unknown                       | M+H | M+AcO | positive | 0.94 | 0.925 |
| PC O-34:3 | PC(18:3e/16:0)/PC(16:1e/18:2) | M+H | M+AcO | positive | 1.30 | 0.353 |
| PC O-36:3 | unknown                       | M+H | M+AcO | positive | 1.10 | 0.968 |
| PC O-36:4 | PC(16:0e/20:4)                | M+H | M+AcO | positive | 0.94 | 0.326 |
| PC O-36:5 | PC(16:1e/20:4)                | M+H | M+AcO | positive | 1.08 | 0.968 |
| PC O-38:3 | unknown                       | M+H | M+AcO | positive | 2.15 | 0.002 |
| PC O-38:5 | PC(18:1e/20:4)                | M+H | M+AcO | positive | 0.91 | 0.313 |

|           |                               |     |       |          |      |       |
|-----------|-------------------------------|-----|-------|----------|------|-------|
| PC O-38:7 | unknown                       | M+H | M+AcO | positive | 1.34 | 0.581 |
| PC O-42:5 | unknown                       | M+H | M+AcO | positive | 1.27 | 0.527 |
| PC O-44:6 | unknown                       | M+H | M+AcO | positive | 0.71 | 0.201 |
| PE 32:0   | PE(16:0/16:0)                 | M+H | M-H   | positive | 0.97 | 0.276 |
| PE 32:1   | PE(16:0/16:1)                 | M+H | M-H   | positive | 3.86 | 0.000 |
| PE 33:1   | PE(15:0/18:1)                 | M+H | M-H   | positive | 2.97 | 0.000 |
| PE 34:1   | PE(16:0/18:1)                 | M+H | M-H   | positive | 3.11 | 0.000 |
| PE 34:2   | PE(16:0/18:2)                 | M+H | M-H   | positive | 2.45 | 0.001 |
| PE 34:3   | unknown                       | M+H | M-H   | positive | 3.19 | 0.001 |
| PE 35:1   | PE(16:0/19:1)                 | M+H | M-H   | positive | 3.20 | 0.000 |
| PE 35:2   | unknown                       | M+H | M-H   | positive | 2.42 | 0.000 |
| PE 36:1   | PE(18:1/18:0)                 | M+H | M-H   | positive | 2.21 | 0.000 |
| PE 36:2   | PE(18:2/18:0)                 | M+H | M-H   | positive | 3.10 | 0.000 |
| PE 36:3   | PE(18:2/18:1)                 | M+H | M-H   | positive | 2.83 | 0.001 |
| PE 36:4   | PE(16:0/20:4)                 | M+H | M-H   | positive | 1.45 | 0.211 |
| PE 36:5   | PE(20:4/16:1)                 | M+H | M-H   | positive | 1.80 | 0.009 |
| PE 37:2   | PE(18:1/19:1)                 | M+H | M-H   | positive | 2.83 | 0.000 |
| PE 38:1   | PE(18:1/20:0)                 | M+H | M-H   | positive | 2.65 | 0.001 |
| PE 38:2   | PE(18:1/20:1)                 | M+H | M-H   | positive | 3.12 | 0.000 |
| PE 38:3   | PE(18:0/20:3)                 | M+H | M-H   | positive | 1.71 | 0.009 |
| PE 38:4   | PE(18:0/20:4)                 | M+H | M-H   | positive | 1.24 | 0.242 |
| PE 38:5   | PE(18:1/20:4)                 | M+H | M-H   | positive | 1.75 | 0.015 |
| PE 38:6   | PE(16:0/22:6)                 | M+H | M-H   | positive | 1.71 | 0.017 |
| PE 40:1   | PE(18:1/22:0)                 | M+H | M-H   | positive | 2.78 | 0.000 |
| PE 40:2   | PE(18:1/22:1)                 | M+H | M-H   | positive | 2.91 | 0.000 |
| PE 40:3   | PE(18:1/22:2)                 | M+H | M-H   | positive | 2.21 | 0.019 |
| PE 40:4   | PE(18:0/22:4)                 | M+H | M-H   | positive | 1.09 | 0.968 |
| PE 40:5   | PE(18:0/22:5)                 | M+H | M-H   | positive | 3.33 | 0.002 |
| PE 40:6   | PE(18:0/22:6)                 | M+H | M-H   | positive | 2.17 | 0.002 |
| PE 40:7   | PE(22:6/18:1)                 | M+H | M-H   | positive | 2.24 | 0.001 |
| PE 42:1   | PE(18:1/24:0)                 | M+H | M-H   | positive | 1.75 | 0.015 |
| PE 42:4   | PE(20:4/22:0)                 | M+H | M-H   | positive | 3.05 | 0.004 |
| PE 42:5   | PE(20:4/22:1)                 | M+H | M-H   | positive | 2.22 | 0.009 |
| PE P-32:0 | PE(16:0p/16:0)                | M+H | M-H   | positive | 0.97 | 0.427 |
| PE P-32:1 | PE(16:0p/16:1)                | M+H | M-H   | positive | 3.98 | 0.001 |
| PE P-34:0 | PE(18:0p/16:0)                | M+H | M-H   | positive | 0.93 | 0.545 |
| PE P-34:1 | PE(16:0p/18:1)                | M+H | M-H   | positive | 2.53 | 0.008 |
| PE P-34:2 | PE(16:0p/18:2)                | M+H | M-H   | positive | 1.93 | 0.069 |
| PE P-35:1 | PE(17:0p/18:1)                | M+H | M-H   | positive | 2.21 | 0.001 |
| PE P-36:1 | PE(18:0p/18:1)                | M+H | M-H   | positive | 1.67 | 0.122 |
| PE P-36:2 | PE(18:1p/18:1)/PE(16:0p/20:2) | M+H | M-H   | positive | 1.89 | 0.109 |
| PE P-36:3 | PE(16:0p/20:3)                | M+H | M-H   | positive | 1.95 | 0.025 |
| PE P-36:4 | PE(16:0p/20:4)                | M+H | M-H   | positive | 1.26 | 0.382 |
| PE P-36:5 | PE(16:0p/20:5)                | M+H | M-H   | positive | 1.39 | 0.353 |
| PE P-37:4 | PE(17:0p/20:4)                | M+H | M-H   | positive | 1.02 | 0.819 |
| PE P-38:2 | PE(18:1p/20:1)                | M+H | M-H   | positive | 2.11 | 0.051 |

|           |                               |                   |     |          |      |       |
|-----------|-------------------------------|-------------------|-----|----------|------|-------|
| PE P-38:3 | PE(18:0p/20:3)                | M+H               | M-H | positive | 1.49 | 0.231 |
| PE P-38:4 | PE(18:0p/20:4)                | M+H               | M-H | positive | 0.85 | 0.150 |
| PE P-38:5 | PE(18:1p/20:4)                | M+H               | M-H | positive | 1.07 | 0.677 |
| PE P-38:6 | PE(16:0p/22:6)                | M+H               | M-H | positive | 1.42 | 0.313 |
| PE P-40:4 | PE(18:0p/22:4)                | M+H               | M-H | positive | 0.84 | 0.088 |
| PE P-40:5 | PE(18:1p/22:4)/PE(18:2p/22:3) | M+H               | M-H | positive | 1.07 | 0.989 |
| PE P-40:6 | PE(18:0p/22:6)                | M+H               | M-H | positive | 1.01 | 0.716 |
| PG 34:1   | PG(16:0/18:1)                 | M+NH <sub>4</sub> | M-H | negative | 1.72 | 0.010 |
| PG 36:1   | PG(18:0/18:1)                 | M+NH <sub>4</sub> | M-H | negative | 0.99 | 0.737 |
| PG 36:2   | PG(18:1/18:1)                 | M+NH <sub>4</sub> | M-H | negative | 4.35 | 0.000 |
| PG 36:3   | PG(18:2/18:1)                 | M+NH <sub>4</sub> | M-H | negative | 2.87 | 0.002 |
| PG 36:4   | PG(18:2/18:2)                 | M+NH <sub>4</sub> | M-H | negative | 2.11 | 0.065 |
| PG 38:3   | PG(18:1/20:2)/PG(18:2/20:1)   | M+NH <sub>4</sub> | M-H | negative | 6.07 | 0.000 |
| PG 40:6   | PG(22:5/18:1)/PG(22:6/18:0)   | M+NH <sub>4</sub> | M-H | negative | 1.94 | 0.109 |
| PG 40:7   | PG(18:1/22:6)                 | M+NH <sub>4</sub> | M-H | negative | 1.34 | 0.882 |
| PG 40:8   | PG(22:6/18:2)                 | M+NH <sub>4</sub> | M-H | negative | 1.17 | 0.040 |
| PG 44:12  | PG(22:6/22:6)                 | M+NH <sub>4</sub> | M-H | negative | 0.65 | 0.006 |
| PI 32:0   | PI(16:0/16:0)                 | M+NH <sub>4</sub> | M-H | negative | 2.79 | 0.003 |
| PI 34:0   | PI(16:0/18:0)                 | M+NH <sub>4</sub> | M-H | negative | 3.68 | 0.000 |
| PI 34:1   | PI(16:0/18:1)                 | M+NH <sub>4</sub> | M-H | negative | 2.24 | 0.004 |
| PI 34:2   | PI(16:0/18:2)                 | M+NH <sub>4</sub> | M-H | negative | 1.54 | 0.201 |
| PI 36:1   | PI(18:1/18:0)                 | M+NH <sub>4</sub> | M-H | negative | 4.97 | 0.000 |
| PI 36:2   | PI(18:1/18:1)                 | M+NH <sub>4</sub> | M-H | negative | 2.61 | 0.001 |
| PI 36:3   | PI(16:0/20:3)                 | M+NH <sub>4</sub> | M-H | negative | 1.76 | 0.019 |
| PI 36:4   | PI(16:0/20:4)                 | M+NH <sub>4</sub> | M-H | negative | 1.02 | 0.510 |
| PI 37:4   | PI(17:0/20:4)                 | M+NH <sub>4</sub> | M-H | negative | 1.18 | 0.264 |
| PI 38:2   | PI(18:0/20:2)                 | M+NH <sub>4</sub> | M-H | negative | 6.47 | 0.000 |
| PI 38:3   | PI(18:0/20:3)                 | M+NH <sub>4</sub> | M-H | negative | 3.29 | 0.000 |
| PI 38:4   | PI(18:0/20:4)                 | M+NH <sub>4</sub> | M-H | negative | 1.07 | 0.904 |
| PI 38:5   | PI(18:1/20:4)                 | M+NH <sub>4</sub> | M-H | negative | 1.25 | 0.657 |
| PI 38:6   | PI(16:0/22:6)                 | M+NH <sub>4</sub> | M-H | negative | 1.69 | 0.104 |
| PI 40:6   | PI(18:0/22:6)                 | M+NH <sub>4</sub> | M-H | negative | 3.53 | 0.000 |
| PS 34:1   | PS(16:0/18:1)                 | M+H               | M-H | positive | 1.36 | 0.300 |
| PS 34:2   | PS(16:0/18:2)                 | M+H               | M-H | positive | 1.38 | 0.382 |
| PS 36:1   | PS(18:0/18:1)                 | M+H               | M-H | positive | 1.29 | 0.545 |
| PS 36:2   | PS(18:0/18:2)                 | M+H               | M-H | positive | 1.89 | 0.045 |
| PS 36:3   | PS(16:0/20:3)                 | M+H               | M-H | positive | 1.66 | 0.093 |
| PS 36:4   | unknown                       | M+H               | M-H | positive | 0.86 | 0.253 |
| PS 38:1   | PS(18:1/20:0)                 | M+H               | M-H | positive | 2.01 | 0.010 |
| PS 38:2   | PS(18:1/20:1)                 | M+H               | M-H | positive | 1.90 | 0.023 |
| PS 38:3   | PS(18:0/20:3)                 | M+H               | M-H | positive | 1.42 | 0.174 |
| PS 38:4   | PS(18:0/20:4)                 | M+H               | M-H | positive | 0.94 | 0.476 |
| PS 38:6   | PS(16:0/22:6)                 | M+H               | M-H | positive | 0.65 | 0.009 |
| PS 40:1   | PS(18:1/22:0)                 | M+H               | M-H | positive | 2.09 | 0.003 |
| PS 40:2   | PS(18:1/22:1)                 | M+H               | M-H | positive | 1.96 | 0.004 |
| PS 40:4   | PS(18:0/22:4)                 | M+H               | M-H | positive | 0.96 | 0.510 |

|           |                               |                   |       |          |      |       |
|-----------|-------------------------------|-------------------|-------|----------|------|-------|
| PS 40:5   | PS(18:0/22:5)                 | M+H               | M-H   | positive | 1.61 | 0.078 |
| PS 40:6   | PS(18:0/22:6)                 | M+H               | M-H   | positive | 1.38 | 0.192 |
| PS 42:1   | unknown                       | M+H               | M-H   | positive | 1.70 | 0.020 |
| PS 42:2   | unknown                       | M+H               | M-H   | positive | 1.63 | 0.042 |
| PS 42:6   | unknown                       | M+H               | M-H   | positive | 2.41 | 0.002 |
| PS 44:6   | unknown                       | M+H               | M-H   | positive | 2.06 | 0.001 |
| PS O-46:0 | unknown                       | M+H               | M-H   | positive | 1.50 | 0.882 |
| SM 31:1;2 | SM(d18:1/13:0)                | M+H               | M+AcO | positive | 1.95 | 0.019 |
| SM 32:1;2 | SM(d18:1/14:0)                | M+H               | M+AcO | positive | 1.35 | 0.253 |
| SM 32:1;3 | SM(d18:1/14:0-OH)             | M+H               | M+AcO | positive | 2.82 | 0.021 |
| SM 33:1;2 | SM(d18:1/15:0)                | M+H               | M+AcO | positive | 1.09 | 0.778 |
| SM 34:0;2 | SM(d18:0/16:0)                | M+H               | M+AcO | positive | 1.20 | 0.510 |
| SM 34:1;2 | SM(d18:1/16:0)                | M+H               | M+AcO | positive | 1.11 | 0.778 |
| SM 34:1;3 | SM(d18:1/16:0)-OH             | M+H               | M+AcO | positive | 1.59 | 0.037 |
| SM 34:2;2 | SM(d18:1/16:1)                | M+H               | M+AcO | positive | 1.23 | 0.288 |
| SM 35:1;2 | SM(d18:1/17:0)                | M+H               | M+AcO | positive | 1.31 | 0.150 |
| SM 36:1;2 | SM(d18:1/18:0)                | M+H               | M+AcO | positive | 1.68 | 0.051 |
| SM 36:2;2 | unknown                       | M+H               | M+AcO | positive | 1.37 | 0.078 |
| SM 38:0;2 | SM(d18:0/20:0)                | M+H               | M+AcO | positive | 4.18 | 0.143 |
| SM 38:1;2 | SM(d18:1/20:0)                | M+H               | M+AcO | positive | 2.52 | 0.005 |
| SM 38:2;2 | SM(d18:1/20:1)                | M+H               | M+AcO | positive | 4.13 | 0.000 |
| SM 39:1;2 | SM(d18:1/21:0)                | M+H               | M+AcO | positive | 3.96 | 0.000 |
| SM 40:0;3 | SM(d18:0/22:0)-OH             | M+H               | M+AcO | positive | 2.89 | 0.001 |
| SM 40:1;2 | SM(d18:1/22:0)                | M+H               | M+AcO | positive | 1.98 | 0.005 |
| SM 40:2;2 | SM(d18:1/22:1)                | M+H               | M+AcO | positive | 2.58 | 0.001 |
| SM 40:3;2 | SM(d18:1/22:2)                | M+H               | M+AcO | positive | 1.39 | 0.109 |
| SM 41:1;2 | SM(d18:1/23:0)                | M+H               | M+AcO | positive | 2.44 | 0.000 |
| SM 41:2;2 | SM(d18:1/23:1)/SM(18:2/23:0)  | M+H               | M+AcO | positive | 1.61 | 0.015 |
| SM 42:0;3 | SM(d18:0/24:0)-OH             | M+H               | M+AcO | positive | 1.35 | 0.035 |
| SM 42:1;2 | SM(d18:1/24:0)                | M+H               | M+AcO | positive | 1.29 | 0.231 |
| SM 42:1;3 | SM(d18:1/24:0)-OH             | M+H               | M+AcO | positive | 2.54 | 0.001 |
| SM 42:2;2 | SM(d18:1/24:1)/SM(d18:2/24:0) | M+H               | M+AcO | positive | 1.00 | 0.840 |
| SM 42:3;2 | SM(d18:1/24:2)                | M+H               | M+AcO | positive | 0.89 | 0.339 |
| SM 43:2;2 | SM(d18:1/25:1)                | M+H               | M+AcO | positive | 1.03 | 0.677 |
| SM 44:1;2 | SM(d18:1/26:0)                | M+H               | M+AcO | positive | 0.70 | 0.023 |
| SM 44:2;2 | SM(d18:1/26:1)                | M+H               | M+AcO | positive | 0.77 | 0.045 |
| SM 44:3;2 | SM(d18:1/26:2)                | M+H               | M+AcO | positive | 0.88 | 0.192 |
| TAG 40:0  |                               | M+NH <sub>4</sub> |       | positive | 2.10 | 0.211 |
| TAG 40:1  |                               | M+NH <sub>4</sub> |       | positive | 3.50 | 0.183 |
| TAG 42:0  |                               | M+NH <sub>4</sub> |       | positive | 2.14 | 0.288 |
| TAG 42:1  |                               | M+NH <sub>4</sub> |       | positive | 2.43 | 0.174 |
| TAG 44:0  |                               | M+NH <sub>4</sub> |       | positive | 2.31 | 0.042 |
| TAG 44:1  |                               | M+NH <sub>4</sub> |       | positive | 1.90 | 0.313 |
| TAG 44:2  |                               | M+NH <sub>4</sub> |       | positive | 1.57 | 0.778 |
| TAG 45:1  |                               | M+NH <sub>4</sub> |       | positive | 1.30 | 0.069 |
| TAG 46:0  |                               | M+NH <sub>4</sub> |       | positive | 2.77 | 0.002 |

|          |                   |          |      |       |
|----------|-------------------|----------|------|-------|
| TAG 46:1 | M+NH <sub>4</sub> | positive | 1.70 | 0.158 |
| TAG 46:2 | M+NH <sub>4</sub> | positive | 1.29 | 0.527 |
| TAG 46:3 | M+NH <sub>4</sub> | positive | 1.25 | 0.840 |
| TAG 47:0 | M+NH <sub>4</sub> | positive | 1.50 | 0.009 |
| TAG 47:1 | M+NH <sub>4</sub> | positive | 1.46 | 0.040 |
| TAG 48:0 | M+NH <sub>4</sub> | positive | 2.66 | 0.002 |
| TAG 48:1 | M+NH <sub>4</sub> | positive | 1.67 | 0.104 |
| TAG 48:2 | M+NH <sub>4</sub> | positive | 1.12 | 0.563 |
| TAG 48:3 | M+NH <sub>4</sub> | positive | 1.09 | 0.882 |
| TAG 48:4 | M+NH <sub>4</sub> | positive | 0.98 | 0.716 |
| TAG 49:0 | M+NH <sub>4</sub> | positive | 2.14 | 0.001 |
| TAG 49:1 | M+NH <sub>4</sub> | positive | 1.36 | 0.054 |
| TAG 49:2 | M+NH <sub>4</sub> | positive | 1.09 | 0.300 |
| TAG 49:3 | M+NH <sub>4</sub> | positive | 1.08 | 0.677 |
| TAG 50:0 | M+NH <sub>4</sub> | positive | 3.26 | 0.001 |
| TAG 50:1 | M+NH <sub>4</sub> | positive | 1.35 | 0.104 |
| TAG 50:2 | M+NH <sub>4</sub> | positive | 0.87 | 0.527 |
| TAG 50:3 | M+NH <sub>4</sub> | positive | 0.78 | 0.946 |
| TAG 50:4 | M+NH <sub>4</sub> | positive | 0.81 | 0.925 |
| TAG 50:5 | M+NH <sub>4</sub> | positive | 1.12 | 0.798 |
| TAG 51:0 | M+NH <sub>4</sub> | positive | 3.62 | 0.000 |
| TAG 51:1 | M+NH <sub>4</sub> | positive | 1.63 | 0.023 |
| TAG 51:2 | M+NH <sub>4</sub> | positive | 0.95 | 0.253 |
| TAG 51:3 | M+NH <sub>4</sub> | positive | 0.68 | 0.657 |
| TAG 51:4 | M+NH <sub>4</sub> | positive | 0.57 | 0.696 |
| TAG 52:0 | M+NH <sub>4</sub> | positive | 4.47 | 0.000 |
| TAG 52:1 | M+NH <sub>4</sub> | positive | 1.73 | 0.028 |
| TAG 52:2 | M+NH <sub>4</sub> | positive | 0.76 | 0.563 |
| TAG 52:3 | M+NH <sub>4</sub> | positive | 0.47 | 0.989 |
| TAG 52:4 | M+NH <sub>4</sub> | positive | 0.35 | 0.412 |
| TAG 52:5 | M+NH <sub>4</sub> | positive | 0.43 | 0.397 |
| TAG 52:6 | M+NH <sub>4</sub> | positive | 1.03 | 0.882 |
| TAG 53:2 | M+NH <sub>4</sub> | positive | 1.03 | 0.201 |
| TAG 53:3 | M+NH <sub>4</sub> | positive | 0.61 | 0.581 |
| TAG 53:4 | M+NH <sub>4</sub> | positive | 0.50 | 0.819 |
| TAG 53:5 | M+NH <sub>4</sub> | positive | 0.64 | 0.778 |
| TAG 54:0 | M+NH <sub>4</sub> | positive | 4.63 | 0.000 |
| TAG 54:1 | M+NH <sub>4</sub> | positive | 3.55 | 0.001 |
| TAG 54:2 | M+NH <sub>4</sub> | positive | 1.23 | 0.061 |
| TAG 54:3 | M+NH <sub>4</sub> | positive | 0.63 | 0.427 |
| TAG 54:4 | M+NH <sub>4</sub> | positive | 0.41 | 0.757 |
| TAG 54:5 | M+NH <sub>4</sub> | positive | 0.37 | 0.840 |
| TAG 54:6 | M+NH <sub>4</sub> | positive | 0.44 | 0.925 |
| TAG 54:7 | M+NH <sub>4</sub> | positive | 0.65 | 0.677 |
| TAG 54:8 | M+NH <sub>4</sub> | positive | 1.25 | 0.989 |
| TAG 55:1 | M+NH <sub>4</sub> | positive | 7.81 | 0.000 |



|                            |                    |                   |     |          |      |       |
|----------------------------|--------------------|-------------------|-----|----------|------|-------|
| TAG 55:2                   |                    | M+NH <sub>4</sub> |     | positive | 3.22 | 0.003 |
| TAG 55:3                   |                    | M+NH <sub>4</sub> |     | positive | 1.29 | 0.048 |
| TAG 55:7                   |                    | M+NH <sub>4</sub> |     | positive | 0.79 | 0.476 |
| TAG 56:0                   |                    | M+NH <sub>4</sub> |     | positive | 3.89 | 0.000 |
| TAG 56:1                   |                    | M+NH <sub>4</sub> |     | positive | 6.40 | 0.000 |
| TAG 56:2                   |                    | M+NH <sub>4</sub> |     | positive | 3.54 | 0.002 |
| TAG 56:3                   |                    | M+NH <sub>4</sub> |     | positive | 2.05 | 0.021 |
| TAG 56:4                   |                    | M+NH <sub>4</sub> |     | positive | 1.30 | 0.088 |
| TAG 56:5                   |                    | M+NH <sub>4</sub> |     | positive | 1.06 | 0.192 |
| TAG 56:6                   |                    | M+NH <sub>4</sub> |     | positive | 1.01 | 0.367 |
| TAG 56:7                   |                    | M+NH <sub>4</sub> |     | positive | 1.15 | 0.476 |
| TAG 56:8                   |                    | M+NH <sub>4</sub> |     | positive | 1.20 | 0.861 |
| TAG 56:9                   |                    | M+NH <sub>4</sub> |     | positive | 1.37 | 0.563 |
| TAG 58:0                   |                    | M+NH <sub>4</sub> |     | positive | 3.52 | 0.000 |
| TAG 58:1                   |                    | M+NH <sub>4</sub> |     | positive | 6.25 | 0.000 |
| TAG 58:10                  |                    | M+NH <sub>4</sub> |     | positive | 1.28 | 0.600 |
| TAG 58:2                   |                    | M+NH <sub>4</sub> |     | positive | 4.03 | 0.001 |
| TAG 58:3                   |                    | M+NH <sub>4</sub> |     | positive | 2.35 | 0.006 |
| TAG 58:4                   |                    | M+NH <sub>4</sub> |     | positive | 2.61 | 0.005 |
| TAG 58:5                   |                    | M+NH <sub>4</sub> |     | positive | 2.71 | 0.009 |
| TAG 58:6                   |                    | M+NH <sub>4</sub> |     | positive | 2.10 | 0.035 |
| TAG 58:7                   |                    | M+NH <sub>4</sub> |     | positive | 1.45 | 0.143 |
| TAG 58:8                   |                    | M+NH <sub>4</sub> |     | positive | 1.49 | 0.276 |
| TAG 58:9                   |                    | M+NH <sub>4</sub> |     | positive | 1.25 | 0.443 |
| TAG 60:1                   |                    | M+NH <sub>4</sub> |     | positive | 8.32 | 0.000 |
| TAG 60:2                   |                    | M+NH <sub>4</sub> |     | positive | 5.06 | 0.002 |
| TAG 60:3                   |                    | M+NH <sub>4</sub> |     | positive | 2.52 | 0.014 |
| TAG 60:4                   |                    | M+NH <sub>4</sub> |     | positive | 2.68 | 0.009 |
| TAG 60:5                   |                    | M+NH <sub>4</sub> |     | positive | 4.48 | 0.002 |
| TAG 60:6                   |                    | M+NH <sub>4</sub> |     | positive | 5.16 | 0.004 |
| TAG 60:8                   |                    | M+NH <sub>4</sub> |     | positive | 3.01 | 0.040 |
| TAG 60:9                   |                    | M+NH <sub>4</sub> |     | positive | 2.87 | 0.074 |
| TG O-50:1                  |                    | M+NH <sub>4</sub> |     | positive | 3.54 | 0.002 |
| HexCer 34:2;2 <sup>#</sup> | HexCer(d18:1/16:1) | M+H               |     | positive | /    | /     |
| FFA 21:0 <sup>#</sup>      |                    |                   | M-H | negative | /    | /     |
| PE 37:1 <sup>#</sup>       | unknown            | M+H               | M-H | positive | /    | /     |

\*, chain composition presented for phospholipids does not indicate stereospecificity;

#, these three lipid species presented higher than 20% of RSD values of QC samples and were excluded for further analysis.

**Table S3** Comparison of lipid abundance and its composition in paired ANT and PCT tissue. Lipid abundance was quantified by normalization to respective internal standards. Lipid composition was calculated as percentage of (sub)classes in entire lipidome. PCT/ANT, folds change of PCT vs. ANT, calculated as ratio of mean value of PCT vs. ANT. Statistical significance was determined by Wilcoxon Signed-Rank test. n.s., not significant.

| lipid<br>(sub)class | abundance |                | composition (%) |                |
|---------------------|-----------|----------------|-----------------|----------------|
|                     | PCT/ANT   | <i>p</i> value | PCT/ANT         | <i>p</i> value |
| FFA                 | 1.65      | <0.01          | 1.00            | n.s.           |
| Cer                 | 2.03      | <0.01          | 1.11            | n.s.           |
| HexCer              | 2.31      | n.s.           | 1.14            | n.s.           |
| SM                  | 1.38      | n.s.           | 0.82            | <0.01          |
| LPC                 | 2.35      | n.s.           | 1.19            | n.s.           |
| LPE                 | 2.60      | n.s.           | 1.21            | n.s.           |
| LPE-P               | 2.07      | n.s.           | 1.06            | n.s.           |
| diacyl-PC           | 1.93      | <0.01          | 1.11            | <0.01          |
| PC-O                | 1.04      | n.s.           | 0.65            | <0.001         |
| diacyl-PE           | 2.18      | <0.001         | 1.24            | <0.05          |
| PE-P                | 1.26      | n.s.           | 0.74            | <0.01          |
| PG                  | 1.73      | <0.05          | 1.04            | n.s.           |
| PI                  | 1.81      | <0.05          | 1.03            | n.s.           |
| PS                  | 1.42      | n.s.           | 0.84            | <0.01          |
| DAG                 | 1.72      | <0.01          | 1.11            | n.s.           |
| TAG                 | 0.75      | n.s.           | 0.73            | n.s.           |
| CE                  | 15.87     | <0.001         | 9.26            | <0.001         |

**Table S4** Composition of fatty acids or radyl residues in various lipid pools including FFA and 5 PL categories (PC, PE, PI, PS, PG). Percentage of SFA-, MUFA-, PUFA-acyl chains and ether-linked chains were calculated based on identified acyl/alkyl/alkenyl chain composition of individual PL species. Mean, mean value; SD, standard deviation; FC, folds change of PCT vs. ANT, calculated as ratio of mean value of PCT vs. ANT; Statistical significance was determined by Wilcoxon Signed-Rank test.

| lipid pool | <u>SFA</u> |      |            |       | <u>MUFA</u> |          |            |      | <u>PUFA</u> |      |     |          | <u>ether</u> |      |            |      | missing* |        |          |      |       |      |     |        |     |
|------------|------------|------|------------|-------|-------------|----------|------------|------|-------------|------|-----|----------|--------------|------|------------|------|----------|--------|----------|------|-------|------|-----|--------|-----|
|            | <u>ANT</u> |      | <u>PCT</u> |       | FC          | <i>p</i> | <u>ANT</u> |      | <u>PCT</u>  |      | FC  | <i>p</i> | <u>ANT</u>   |      | <u>PCT</u> |      |          | FC     | <i>p</i> |      |       |      |     |        |     |
|            | mean       | SD   | mean       | SD    |             |          | mean       | SD   | mean        | SD   |     |          | mean         | SD   | mean       | SD   |          |        |          | mean | SD    |      |     |        |     |
| FFA        | 65.5%      | 6.1% | 51.0%      | 11.2% | 0.8         | <0.001   | 13.1%      | 2.3% | 19.7%       | 6.9% | 1.5 | <0.001   | 21.4%        | 4.4% | 29.4%      | 9.4% | 1.4      | <0.001 |          |      |       |      |     |        |     |
| PC         | 44.1%      | 1.5% | 42.5%      | 2.1%  | 1.0         | <0.01    | 28.6%      | 3.0% | 34.3%       | 5.6% | 1.2 | <0.001   | 22.8%        | 2.4% | 18.5%      | 4.7% | 0.8      | <0.001 | 2.0%     | 0.5% | 1.3%  | 0.5% | 0.6 | <0.001 | ~3% |
| PE         | 18.0%      | 1.8% | 22.5%      | 4.4%  | 1.3         | <0.001   | 12.3%      | 2.8% | 17.4%       | 5.0% | 1.4 | <0.001   | 40.1%        | 2.2% | 36.4%      | 4.2% | 0.9      | <0.001 | 28.7%    | 2.7% | 22.6% | 5.8% | 0.8 | <0.001 | ~1% |
| PI         | 46.7%      | 0.9% | 46.7%      | 2.5%  | 1.0         | n.s.     | 15.8%      | 2.9% | 21.4%       | 6.3% | 1.4 | <0.001   | 37.5%        | 2.7% | 31.9%      | 5.5% | 0.8      | <0.001 |          |      |       |      |     |        |     |
| PS         | 45.6%      | 0.9% | 44.3%      | 1.6%  | 1.0         | <0.001   | 30.5%      | 2.1% | 31.2%       | 3.1% | 1.0 | n.s.     | 20.9%        | 1.8% | 20.6%      | 2.4% | 1.0      | n.s.   |          |      |       |      |     |        | ~3% |
| PG         | 29.7%      | 6.6% | 23.5%      | 7.6%  | 0.8         | <0.01    | 44.7%      | 2.7% | 51.2%       | 6.2% | 1.1 | <0.001   | 22.7%        | 6.5% | 20.0%      | 7.3% | 0.9      | <0.05  |          |      |       |      |     |        | ~4% |

\*, Approximately 1%-4% chains in PC, PE, PS and PG were not taken into calculation due to absence of its exact compositional information and marked as “missing”.

n.s., not significant.

**Table S5** Detailed information of related genes and corresponding lipid metabolism pathway obtained by transcriptomics. PCT/ANT, folds change of PCT vs. ANT, calculated as ratio of mean value of PCT vs. ANT. Statistical significance was determined by Wilcoxon Signed-Rank test.

| gene     | full name                                                | PCT/ANT | <i>p</i> value | related lipid pathways                    |
|----------|----------------------------------------------------------|---------|----------------|-------------------------------------------|
| ALOX12B  | arachidonate 12-lipoxygenase, 12R type                   | 0.68    | 0.031          | Arachidonic acid metabolism               |
| ALOX15B  | arachidonate 15-lipoxygenase, type B                     | 3.85    | 0.001          | Arachidonic acid metabolism               |
| PTGDS    | prostaglandin D2 synthase                                | 0.38    | 0.002          | Arachidonic acid metabolism               |
| PTGES3   | prostaglandin E synthase 3                               | 1.68    | 0.000          | Arachidonic acid metabolism               |
| PTGIS    | prostaglandin I2 synthase                                | 0.45    | 0.001          | Arachidonic acid metabolism               |
| ABCA1    | ATP-binding cassette, sub-family A, member 1             | 1.55    | 0.007          | Cholesterol trafficking                   |
| ABCG1    | ATP-binding cassette, sub-family G, member 1             | 1.81    | 0.002          | Cholesterol trafficking                   |
| CEPT1    | choline/ethanolamine phosphotransferase 1                | 1.31    | 0.001          | Ether lipid metabolism                    |
| EPT1     | ethanolaminephosphotransferase 1                         | 1.79    | 0.000          | Ether lipid metabolism                    |
| LPCAT1   | lysophosphatidylcholine acyltransferase 1                | 1.62    | 0.014          | Ether lipid metabolism                    |
| LPCAT2   | lysophosphatidylcholine acyltransferase 2                | 0.75    | 0.013          | Ether lipid metabolism                    |
| PLA2G12A | Phospholipase A2, group XIIA                             | 2.01    | 0.000          | Ether lipid metabolism                    |
| PLA2G2A  | Phospholipase A2, group IIA                              | 1.36    | 0.049          | Ether lipid metabolism                    |
| PLA2G4E  | Phospholipase A2, group IVE                              | 2.18    | 0.018          | Ether lipid metabolism                    |
| PPAP2A   | phosphatidic acid phosphatase type 2A                    | 1.29    | 0.030          | Ether lipid metabolism                    |
| ACACA    | acetyl-CoA carboxylase alpha                             | 3.24    | 0.000          | Fatty acid biosynthesis                   |
| FASN     | fatty acid synthase                                      | 3.09    | 0.001          | Fatty acid biosynthesis                   |
| SCD      | stearoyl-CoA desaturase                                  | 2.22    | 0.001          | Fatty acid desaturation                   |
| ELOVL6   | ELOVL fatty acid elongase 6                              | 1.89    | 0.000          | Fatty acid elongation                     |
| ELOVL5   | ELOVL fatty acid elongase 5                              | 1.80    | 0.002          | Fatty acid elongation                     |
| ELOVL2   | ELOVL fatty acid elongase 2                              | 2.94    | 0.000          | Fatty acid elongation                     |
| ELOVL7   | ELOVL fatty acid elongase 7                              | 2.67    | 0.000          | Fatty acid elongation                     |
| SREBF1   | sterol regulatory element binding transcription factor 1 | 1.76    | 0.022          | transcriptional regulation of lipogenesis |
| THRSP    | thyroid hormone responsive                               | 2.68    | 0.008          | transcriptional regulation of lipogenesis |

|          |                                                             |      |       |                                                         |
|----------|-------------------------------------------------------------|------|-------|---------------------------------------------------------|
| LIPE     | lipase, hormone-sensitive                                   | 0.54 | 0.007 | Glycerolipid metabolism, cholesterol metabolism         |
| PLA2G12A | Phospholipase A2, group XIIA                                | 2.01 | 0.000 | Glycerophospholipid metabolism                          |
| LPCAT3   | lysophosphatidylcholine acyltransferase 3                   | 1.61 | 0.000 | Glycerophospholipid metabolism                          |
| EPT1     | ethanolaminephosphotransferase 1                            | 1.79 | 0.000 | Glycerophospholipid metabolism                          |
| CEPT1    | choline/ethanolamine phosphotransferase 1                   | 1.31 | 0.001 | Glycerophospholipid metabolism                          |
| PTDSS1   | phosphatidylserine synthase 1                               | 1.61 | 0.005 | Glycerophospholipid metabolism                          |
| LPCAT2   | lysophosphatidylcholine acyltransferase 2                   | 0.75 | 0.013 | Glycerophospholipid metabolism                          |
| LPCAT1   | lysophosphatidylcholine acyltransferase 1                   | 1.62 | 0.014 | Glycerophospholipid metabolism                          |
| PLA2G4E  | Phospholipase A2, group IVE                                 | 2.18 | 0.018 | Glycerophospholipid metabolism                          |
| PLA2G2A  | Phospholipase A2, group IIA                                 | 1.36 | 0.049 | Glycerophospholipid metabolism                          |
| CRLS1    | cardiolipin synthase 1                                      | 1.33 | 0.014 | Glycerophospholipid metabolism                          |
| CHKA     | choline kinase alpha                                        | 1.75 | 0.005 | Glycerophospholipid metabolism                          |
| PCYT2    | phosphate cytidylyltransferase 2, ethanolamine              | 1.49 | 0.024 | Glycerophospholipid metabolism                          |
| CDS1     | CDP-diacylglycerol synthase                                 | 1.53 | 0.001 | Glycerophospholipid metabolism                          |
| MBOAT2   | membrane bound O-acyltransferase domain containing 2        | 3.25 | 0.000 | Glycerophospholipid metabolism, Glycerolipid metabolism |
| LCLAT1   | lysocardiolipin acyltransferase 1                           | 2.56 | 0.000 | Glycerophospholipid metabolism, Glycerolipid metabolism |
| GK       | glycerol kinase                                             | 1.38 | 0.001 | Glycerophospholipid metabolism, Glycerolipid metabolism |
| LPIN2    | lipin 2                                                     | 1.45 | 0.004 | Glycerophospholipid metabolism, Glycerolipid metabolism |
| DGKG     | diacylglycerol kinase, gamma                                | 0.52 | 0.006 | Glycerophospholipid metabolism, Glycerolipid metabolism |
| DGKD     | diacylglycerol kinase, delta                                | 1.68 | 0.016 | Glycerophospholipid metabolism, Glycerolipid metabolism |
| PPAP2A   | phosphatidic acid phosphatase type 2A                       | 1.29 | 0.030 | Glycerophospholipid metabolism, Glycerolipid metabolism |
| GPAM     | glycerol 3-phosphate acyltransferase                        | 1.34 | 0.030 | Glycerophospholipid metabolism, Glycerolipid metabolism |
| AGPAT3   | 1-acylglycerol-3-phosphate O-acyltransferase 3              | 1.65 | 0.005 | Glycerophospholipid metabolism, Glycerolipid metabolism |
| SLC27A2  | solute carrier family 27 (fatty acid transporter), member 2 | 1.89 | 0.001 | lipid uptaking/transporting                             |
| SLC27A4  | solute carrier family 27 (fatty acid transporter), member 4 | 1.55 | 0.022 | lipid uptaking/transporting                             |
| SLC27A5  | solute carrier family 27 (fatty acid transporter), member 5 | 1.59 | 0.009 | lipid uptaking/transporting                             |
| SCARB1   | scavenger receptor class B, member 1                        | 1.47 | 0.011 | lipid uptaking/transporting                             |

|        |                                                        |      |       |                             |
|--------|--------------------------------------------------------|------|-------|-----------------------------|
| GOT2   | glutamic-oxaloacetic transaminase 2, mitochondrial     | 1.47 | 0.011 | lipid uptaking/transporting |
| ACER1  | alkaline ceramidase 1                                  | 0.37 | 0.001 | Sphingolipid metabolism     |
| ACER2  | alkaline ceramidase 2                                  | 1.70 | 0.002 | Sphingolipid metabolism     |
| ASAH1  | N-acylsphingosine amidohydrolase (acid ceramidase) 1   | 1.87 | 0.001 | Sphingolipid metabolism     |
| ASAH2  | N-acylsphingosine amidohydrolase (acid ceramidase) 2   | 1.36 | 0.032 | Sphingolipid metabolism     |
| CERS1  | ceramide synthase 1                                    | 2.48 | 0.004 | Sphingolipid metabolism     |
| CERS2  | ceramide synthase 2                                    | 1.61 | 0.001 | Sphingolipid metabolism     |
| CERS3  | ceramide synthase 3                                    | 0.46 | 0.024 | Sphingolipid metabolism     |
| CERS4  | ceramide synthase 4                                    | 2.74 | 0.000 | Sphingolipid metabolism     |
| CERS6  | ceramide synthase 6                                    | 1.52 | 0.003 | Sphingolipid metabolism     |
| DEGS1  | delta(4)-desaturase, sphingolipid 1                    | 1.76 | 0.001 | Sphingolipid metabolism     |
| PPAP2A | phosphatidic acid phosphatase type 2A                  | 1.29 | 0.030 | Sphingolipid metabolism     |
| SGMS1  | sphingomyelin synthase 1                               | 1.73 | 0.000 | Sphingolipid metabolism     |
| SGMS2  | sphingomyelin synthase 2                               | 1.27 | 0.008 | Sphingolipid metabolism     |
| SGPP1  | sphingosine-1-phosphate phosphatase 1                  | 1.90 | 0.000 | Sphingolipid metabolism     |
| SGPP2  | sphingosine-1-phosphate phosphatase 2                  | 1.69 | 0.019 | Sphingolipid metabolism     |
| SMPD2  | neutral sphingomyelinase                               | 1.77 | 0.043 | Sphingolipid metabolism     |
| SPTLC2 | serine palmitoyltransferase, long chain base subunit 2 | 1.52 | 0.001 | Sphingolipid metabolism     |
| FDPS   | farnesyl diphosphate synthase                          | 1.48 | 0.018 | Steroid biosynthesis        |
| FDFT1  | farnesyl-diphosphate farnesyltransferase 1             | 1.38 | 0.012 | Steroid biosynthesis        |
| SQLE   | squalene epoxidase                                     | 1.31 | 0.046 | Steroid biosynthesis        |
| SOAT1  | sterol O-acyltransferase 1                             | 1.43 | 0.011 | Steroid biosynthesis        |

---

**Table S6** Detailed information of related miRNAs, their target genes and corresponding lipid metabolism pathway obtained by transcriptomics. PCT/ANT, folds change of PCT vs. ANT, calculated as ratio of mean value of PCT vs. ANT. Statistical significance was determined by Wilcoxon Signed-Rank test.

| miRNA           | target gene | PCT/ANT | <i>p</i> value | related lipid pathway                                   |
|-----------------|-------------|---------|----------------|---------------------------------------------------------|
| hsa-miR-222-3p  | ACACA       | 0.51    | 0.000          | Fatty acid biosynthesis                                 |
| hsa-miR-24-3p   | ACACA       | 0.75    | 0.021          | Fatty acid biosynthesis                                 |
| hsa-miR-222-3p  | FASN        | 0.51    | 0.000          | Fatty acid biosynthesis                                 |
| hsa-miR-26a-5p  | FASN        | 0.86    | 0.007          | Fatty acid biosynthesis                                 |
| hsa-miR-27b-3p  | FASN        | 0.72    | 0.005          | Fatty acid biosynthesis                                 |
| hsa-miR-331-3p  | FASN        | 0.42    | 0.012          | Fatty acid biosynthesis                                 |
| hsa-miR-92b-3p  | FASN        | 0.74    | 0.002          | Fatty acid biosynthesis                                 |
| hsa-let-7e-5p   | SCD         | 0.73    | 0.001          | Fatty acid desaturation                                 |
| hsa-miR-331-3p  | SCD         | 0.42    | 0.012          | Fatty acid desaturation                                 |
| hsa-miR-455-3p  | SCD         | 0.52    | 0.001          | Fatty acid desaturation                                 |
| hsa-miR-124-3p  | ELOVL5      | 0.76    | 0.012          | Fatty acid elongation                                   |
| hsa-miR-204-5p  | ELOVL6      | 0.58    | 0.002          | Fatty acid elongation                                   |
| hsa-miR-26a-5p  | ELOVL6      | 0.86    | 0.007          | Fatty acid elongation                                   |
| hsa-miR-124-3p  | CEPT1       | 0.76    | 0.012          | Glycerophospholipid metabolism, Ether lipid metabolism  |
| hsa-miR-23b-3p  | CEPT1       | 0.77    | 0.034          | Glycerophospholipid metabolism, Ether lipid metabolism  |
| hsa-miR-26a-5p  | CEPT1       | 0.86    | 0.007          | Glycerophospholipid metabolism, Ether lipid metabolism  |
| hsa-miR-92b-3p  | PLA2G12A    | 0.74    | 0.002          | Glycerophospholipid metabolism, Ether lipid metabolism  |
| hsa-miR-24-3p   | AGPAT3      | 0.75    | 0.021          | Glycerophospholipid metabolism, Glycerolipid metabolism |
| hsa-miR-100-5p  | AGPAT3      | 0.73    | 0.002          | Glycerophospholipid metabolism, Glycerolipid metabolism |
| hsa-miR-27a-3p  | GPAM        | 0.73    | 0.007          | Glycerophospholipid metabolism, Glycerolipid metabolism |
| hsa-miR-124-3p  | LCLAT1      | 0.76    | 0.012          | Glycerophospholipid metabolism, Glycerolipid metabolism |
| hsa-miR-125a-5p | SCARB1      | 0.71    | 0.000          | lipid uptaking/transporting                             |
| hsa-miR-455-3p  | SCARB1      | 0.52    | 0.001          | lipid uptaking/transporting                             |
| hsa-miR-455-5p  | SCARB1      | 0.55    | 0.000          | lipid uptaking/transporting                             |
| hsa-miR-1       | SLC27A4     | 0.56    | 0.001          | lipid uptaking/transporting                             |
| hsa-miR-1       | CERS2       | 0.56    | 0.001          | Sphingolipid metabolism                                 |
| hsa-miR-124-3p  | CERS2       | 0.76    | 0.012          | Sphingolipid metabolism                                 |
| hsa-miR-221-3p  | CERS2       | 0.52    | 0.001          | Sphingolipid metabolism                                 |
| hsa-miR-222-3p  | CERS2       | 0.51    | 0.000          | Sphingolipid metabolism                                 |
| hsa-miR-124-3p  | SGMS1       | 0.76    | 0.012          | Sphingolipid metabolism                                 |
| hsa-let-7e-5p   | FDPS        | 0.73    | 0.001          | Steroid biosynthesis                                    |
| hsa-let-7e-5p   | SQLE        | 0.73    | 0.001          | Steroid biosynthesis                                    |

**Table S7** Detailed statistical information of 9 most prominently elevated lipid species selected according to *p* value, AUC and PCT-to-ANT folds change, i.e., scheme shown in Fig. 3A

| lipids          | PCT vs. ANT    |         |      | Std.<br>Error | 95% Confidence<br>Interval |       | Sensitivity | Specificity |
|-----------------|----------------|---------|------|---------------|----------------------------|-------|-------------|-------------|
|                 | <i>p</i> value | PCT/ANT | AUC  |               | Lower                      | Upper |             |             |
| CE 24:5         | <0.001         | 35.46   | 0.94 | 0.03          | 0.88                       | 1.00  | 0.96        | 0.80        |
| CE 24:4         | <0.001         | 24.86   | 0.94 | 0.03          | 0.87                       | 1.00  | 0.96        | 0.88        |
| CE 20:1         | <0.001         | 45.48   | 0.94 | 0.03          | 0.87                       | 1.00  | 0.72        | 1.00        |
| CE 18:1         | <0.001         | 11.78   | 0.93 | 0.04          | 0.86                       | 1.00  | 0.84        | 0.92        |
| Cer(d18:1/22:1) | <0.001         | 5.99    | 0.91 | 0.05          | 0.82                       | 1.00  | 0.88        | 0.92        |
| FFA22:3         | <0.001         | 5.39    | 0.91 | 0.04          | 0.83                       | 0.99  | 0.96        | 0.72        |
| CE 22:6         | <0.001         | 10.48   | 0.90 | 0.04          | 0.82                       | 0.98  | 0.84        | 0.80        |
| TAG 58:1        | <0.001         | 6.25    | 0.89 | 0.05          | 0.80                       | 0.98  | 0.88        | 0.84        |
| Cer(d18:2/20:0) | <0.001         | 11.38   | 0.89 | 0.05          | 0.78                       | 0.99  | 0.80        | 1.00        |



**Table S8** Differential lipids significantly associated with PCa progression assessed by Gleason Score grades (a) and metastatic grades, i.e., localized, locally advanced and metastatic grade (b).

**Table S8a**

| lipid   | PCT vs ANT      |                             | PCT-to-ANT <sup>a</sup> ratio in GS grades |             |             |                             |
|---------|-----------------|-----------------------------|--------------------------------------------|-------------|-------------|-----------------------------|
|         | FC <sup>a</sup> | <i>p</i> value <sup>b</sup> | GS<7 (n=2)                                 | GS=7 (n=12) | GS>7 (n=11) | <i>p</i> value <sup>c</sup> |
| CE 22:6 | 10.48           | <0.001                      | 0.5                                        | 4.6         | 23.6        | 0.006                       |
| CE 24:4 | 24.86           | <0.001                      | 0.8                                        | 22.9        | 48.5        | 0.014                       |
| FFA20:2 | 3.90            | <0.001                      | 0.8                                        | 2.9         | 6.9         | 0.040                       |
| FFA20:4 | 2.61            | <0.001                      | 0.7                                        | 2.3         | 3.6         | 0.039                       |
| FFA20:5 | 2.49            | 0.002                       | 0.7                                        | 1.7         | 4.1         | 0.033                       |
| FFA22:2 | 4.43            | <0.001                      | 0.7                                        | 3.2         | 8.6         | 0.026                       |
| FFA22:3 | 5.39            | <0.001                      | 1.0                                        | 4.2         | 9.7         | 0.026                       |
| FFA22:5 | 3.06            | 0.001                       | 0.7                                        | 2.7         | 4.1         | 0.039                       |
| PG 36:3 | 2.87            | 0.002                       | 0.5                                        | 2.1         | 5.8         | 0.031                       |

**Table S8b**

| lipid    | PCT vs ANT      |                             | PCT-to-ANT <sup>a</sup> ratio in metastatic grades |                                       |                             |
|----------|-----------------|-----------------------------|----------------------------------------------------|---------------------------------------|-----------------------------|
|          | FC <sup>a</sup> | <i>p</i> value <sup>b</sup> | localized(n=16)                                    | locally advanced and metastatic (n=7) | <i>p</i> value <sup>d</sup> |
| CE 22:6  | 10.5            | <0.001                      | 5.5                                                | 46.7                                  | 0.033                       |
| CE 24:4  | 24.9            | <0.001                      | 14.5                                               | 149.9                                 | 0.038                       |
| CE 24:5  | 35.5            | <0.001                      | 14.2                                               | 259.7                                 | 0.016                       |
| TAG 54:1 | 3.5             | 0.001                       | 2.0                                                | 25.4                                  | 0.038                       |
| TAG 55:2 | 3.2             | 0.003                       | 1.6                                                | 47.9                                  | 0.019                       |
| TAG 56:2 | 3.5             | 0.002                       | 1.8                                                | 28.9                                  | 0.038                       |
| TAG 58:4 | 2.6             | 0.005                       | 1.0                                                | 19.5                                  | 0.033                       |
| TAG 58:5 | 2.7             | 0.009                       | 1.0                                                | 20.9                                  | 0.033                       |
| TAG 60:5 | 4.5             | 0.002                       | 1.7                                                | 66.6                                  | 0.013                       |
| TAG 60:6 | 5.2             | 0.004                       | 1.8                                                | 46.1                                  | 0.013                       |

a, FC(folds change) and PCT-to-ANT ratio are calculated as ratio of mean value of PCT vs. ANT;

b, statistical significance determined by Wilcoxon Signed-Rank test;

c, statistical significance determined by Kruskal-Wallis test;

d, statistical significance determined by Mann-Whitney test

## References

1. Wallner, S. & Schmitz, G. Plasmalogens the neglected regulatory and scavenging lipid species. *Chem Phys Lipids* **164**, 573-589 (2011).
2. Paschos, A., Pandya, R., Duivenvoorden, W. C. M. & Pinthus, J. H. Oxidative stress in prostate cancer: changing research concepts towards a novel paradigm for prevention and therapeutics. *Prostate Cancer P D* **16**, 217-225 (2013).
